# Supplementary material
Source: PubMed Central journal article supplement (PMC4928587)

**Zhang et al., Suppl. Fig. 1**

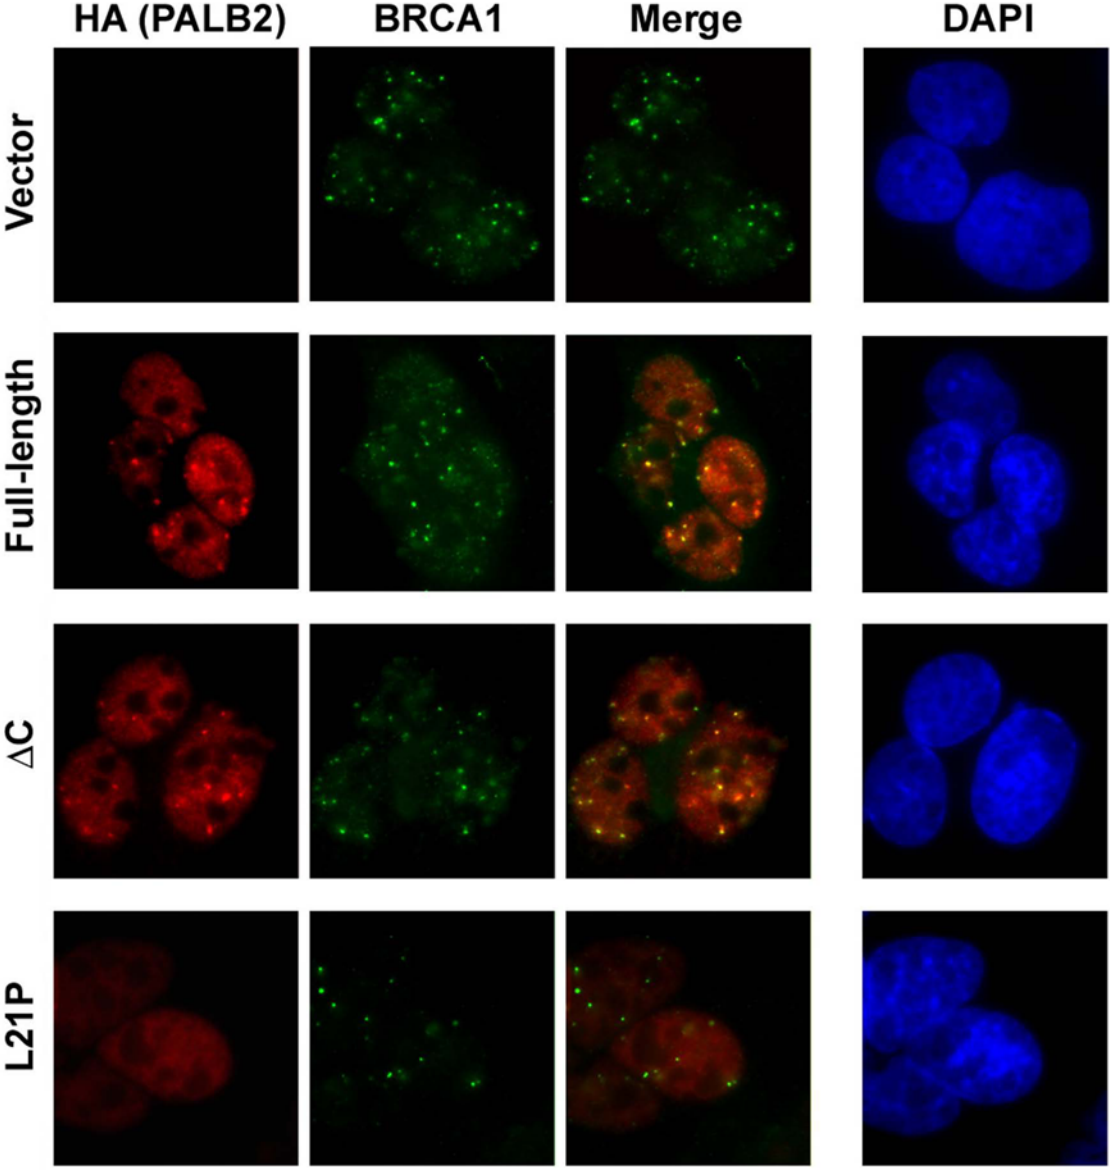

Zhang et al., Suppl. Fig. 2

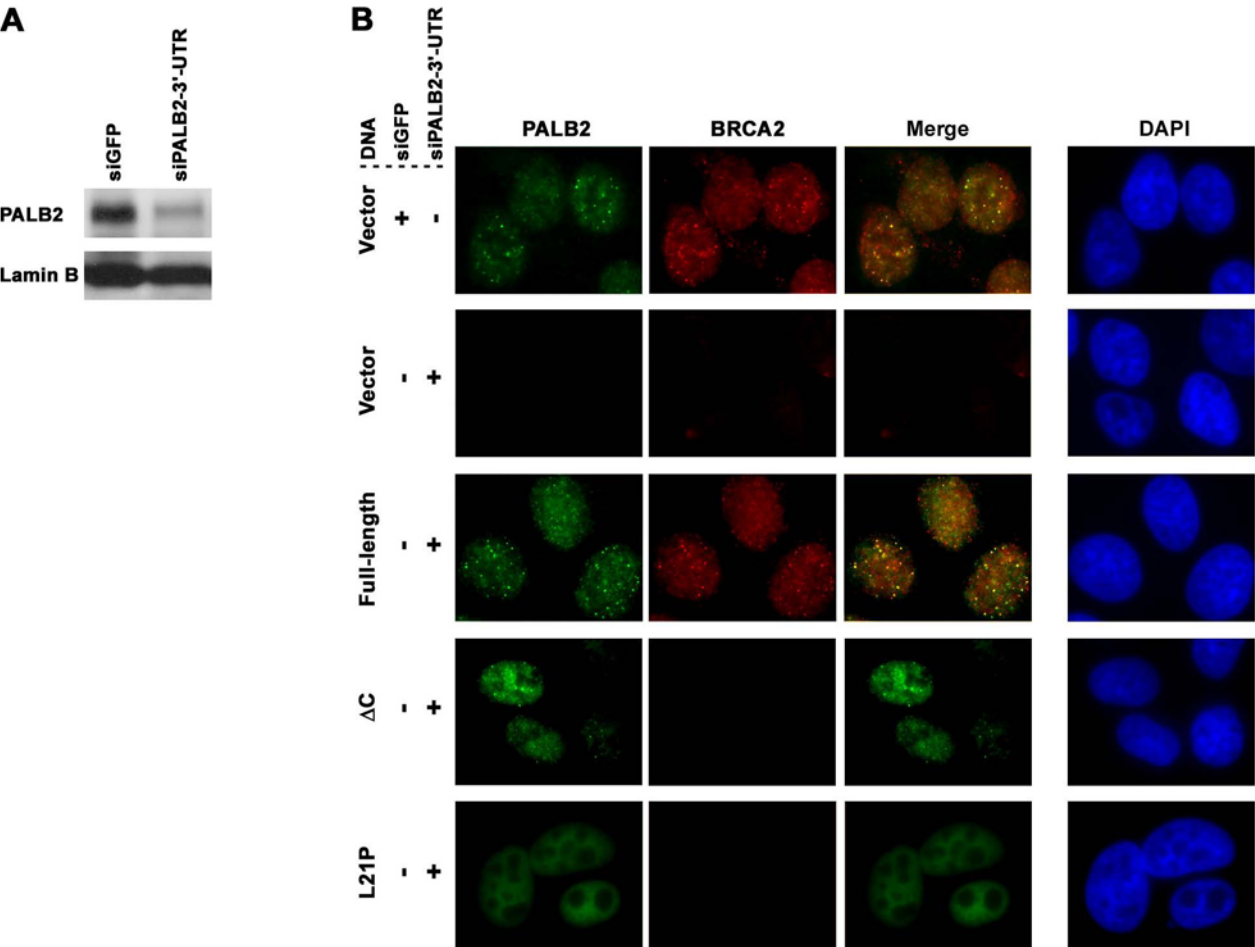

Supplement: NIHMS797134-supplement-Supp.pdf [file NIHMS797134-supplement-Supp.pdf]
